# Supplementary material for: Predictive Value of the Mayo Adhesive Probability (MAP) Score in Laparoscopic Partial Nephrectomies: A Systematic Review from the EAU Section of Uro-Technology (ESUT)
Source: MDPI journal article supplement (doi:10.3390/cancers16081455), 2024-04-10
Supplement: s1 [file s1]

**Table S1.** Risk of Bias Assessment of included studies according to the Quality in Prognosis Studies (QUIPS) tool for non-randomized studies.

| Biases                             | Yuanxin et al., (2019) [16] | Bier et al. (2017), [17] | Fang et al. (2021), [18] | Yang et al. (2020), [19] | Jin et al. (2019), [20] | Tan et al. (2021), [21] | Qian et al. (2019), [22] | Hata et al. (2021), [23] |
|------------------------------------|-----------------------------|--------------------------|--------------------------|--------------------------|-------------------------|-------------------------|--------------------------|--------------------------|
| Study Participation                | Low                         | Low                      | Low                      | Low                      | Low                     | Low                     | Low                      | Low                      |
| Study Attrition                    | Low                         | Low                      | Low                      | Low                      | Low                     | Low                     | Low                      | Low                      |
| Prognostic Factor Measurement      | Low                         | Low                      | Low                      | Low                      | Low                     | Low                     | Low                      | Low                      |
| Outcome Measurement                | Low                         | Low                      | Low                      | Low                      | Low                     | Low                     | Low                      | Low                      |
| Study Confounding                  | Low                         | Moderate                 | Moderate                 | Moderate                 | Moderate                | Moderate                | Moderate                 | Moderate                 |
| Statistical Analysis and Reporting | Low                         | Low                      | Low                      | Low                      | Low                     | Low                     | Low                      | Low                      |
| Overall Risk of Bias               | Low                         | Low                      | Low                      | Low                      | Low                     | Low                     | Low                      | Low                      |

**Table S2.** Predictive value of the MAP score. MAP: Mayo Adhesive Probability, OT: Operative Time, EBL: Estimated Blood Loss, APF: Adherent Perinephric Fat, PN: Partial Nephrectomy.

| Study Name                  | Intraoperative Parameters                                                                                                                                                                                                          | Postoperative Parameters                                                                                                                       |
|-----------------------------|------------------------------------------------------------------------------------------------------------------------------------------------------------------------------------------------------------------------------------|------------------------------------------------------------------------------------------------------------------------------------------------|
| Yuanxin et al. (2019), [16] | Patients with a higher MAP score had longer total OT and dissection times and increased EBL.                                                                                                                                       | A statistically significant association was not reported.                                                                                      |
| Bier et al. (2017), [17]    | With a cut-off value of $\geq 3$ , the MAP score had a sensitivity of 87.5% for predicting intraoperative and postoperative complications. Nevertheless, the MAP score was not associated with the severity of these complications | MAP score was equivalent with the RENAL score for predicting the overall complications, according to Clavien-Dindo Classification (AUC=0.655). |
| Fang et al. (2021), [18]    | APF group had significantly longer OT, greater EBL and higher renal capsule rupture rates.                                                                                                                                         | A statistically significant association was not reported.                                                                                      |
| Yang et al. (2020), [19]    | A statistically significant association was not reported.                                                                                                                                                                          | A statistically significant association was not reported.                                                                                      |
| Jin et al. (2019), [20]     | MAP score was correlated with OT, EBL and intraoperative complications (conversion to radical surgery and injury to adjacent structures)                                                                                           | A statistically significant association was not reported.                                                                                      |
| Tan et al. (2021), [21]     | A statistically significant association was not reported.                                                                                                                                                                          | A statistically significant association was not reported.                                                                                      |
| Qian et al. (2019), [22]    | MAP score was an independent predictive factor for the feasibility of segmental artery clamping during laparoscopic PN.                                                                                                            | A statistically significant association was not reported.                                                                                      |
| Hata et al. (2021), [23]    | A statistically significant association was not reported.                                                                                                                                                                          | MAP score on the contralateral side, and not on the tumor side, was significantly associated with loss of renal function postoperatively.      |
